# Supplementary material for: Sputtered Cu-doped NiO thin films as an efficient electrocatalyst for methanol oxidation
Source: Royal Society of Chemistry journal article supplement (doi:10.1039/d3ra00380a), 2023-01-01
Supplement: d3ra00380a1.pdf [file d3ra00380a1.pdf]

## Sputtered Cu-doped NiO Thin Films as an Efficient Electrocatalyst for Methanol Oxidation

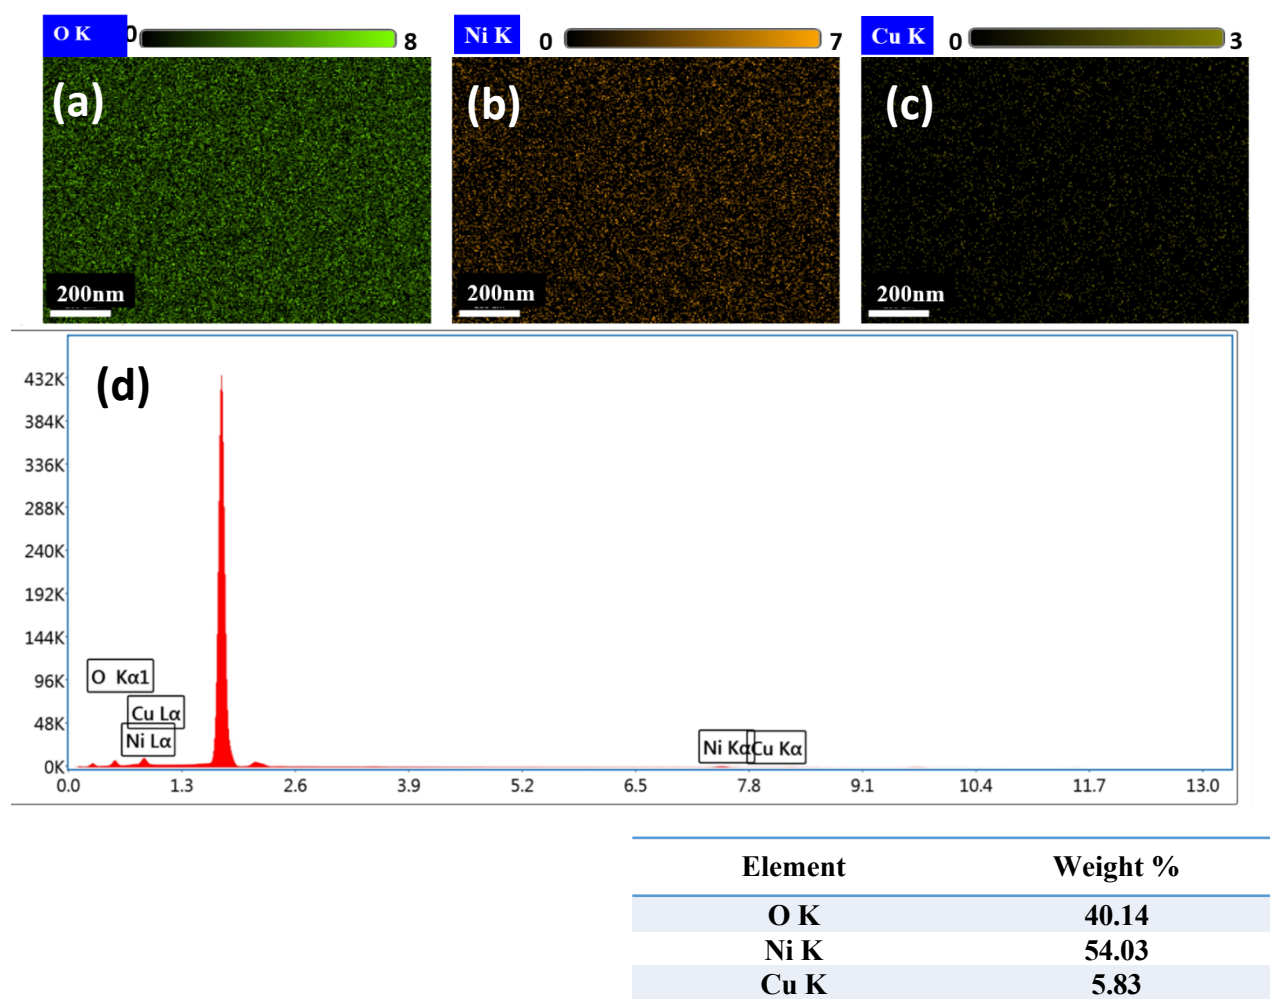

**Fig.1S.** EDS spectrum of NiO-Cu 600, (a) O, (b) Ni, (C) Cu, and (d) Elemental mapping images of Ni, O, and Cu.

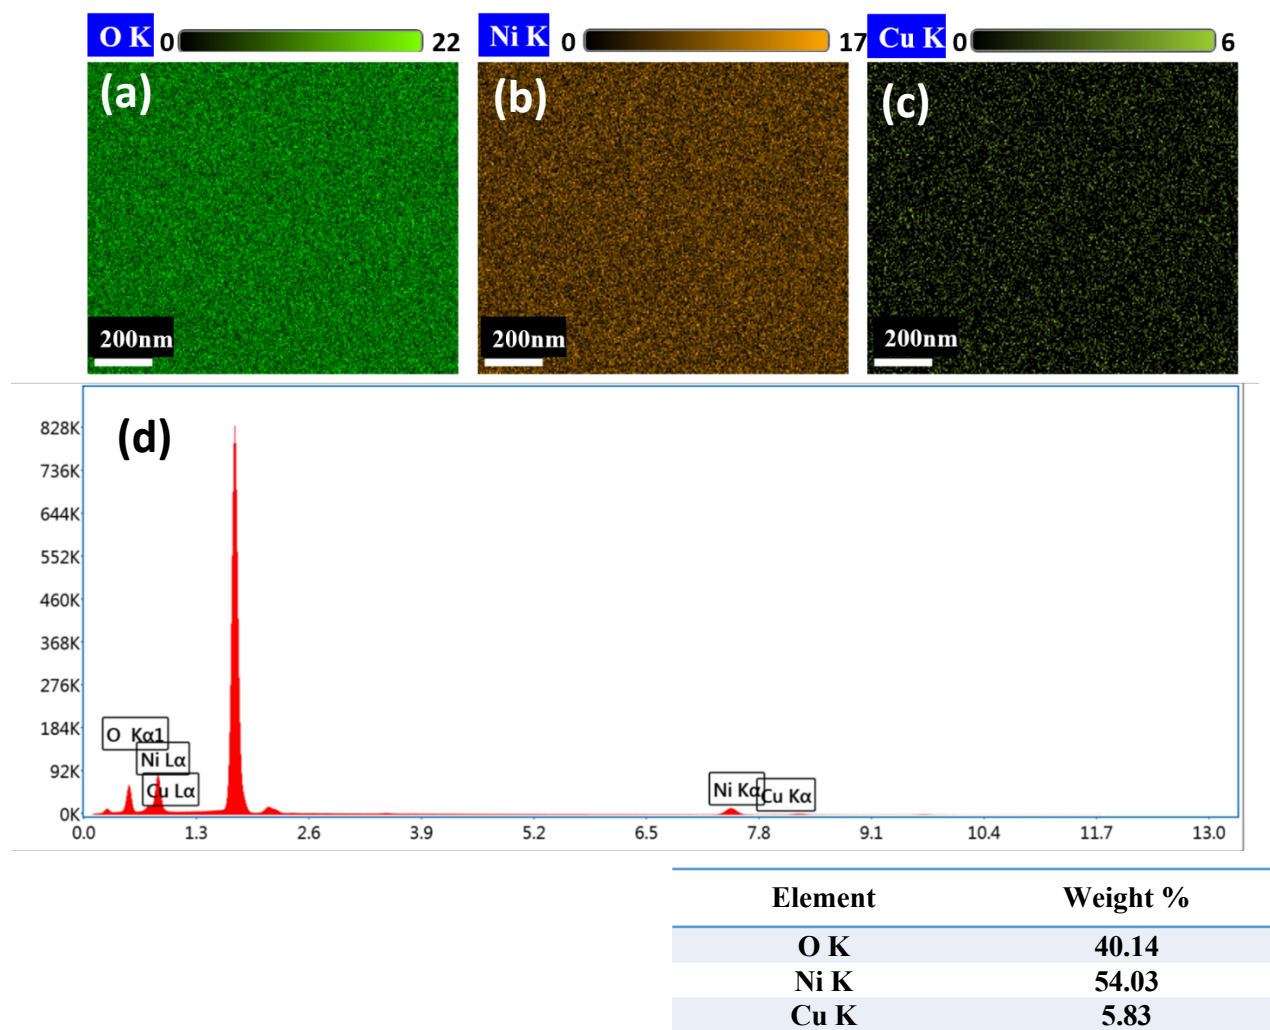

**Fig.2S.** EDS spectrum of NiO-Cu 900, (a) O, (b) Ni, (C) Cu, and (d) Elemental mapping images of Ni, O, and Cu.

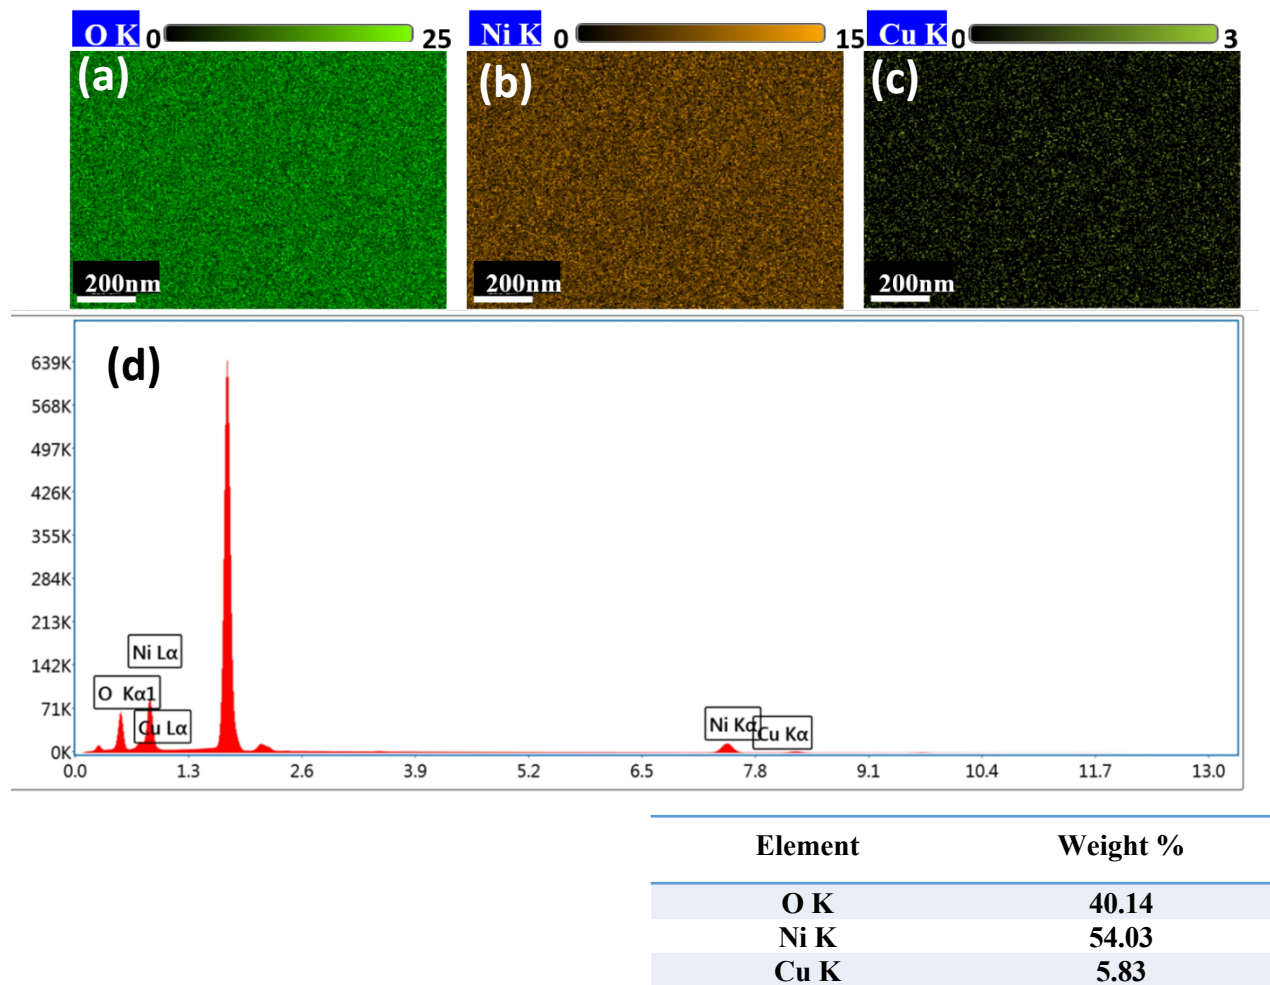

**Fig.3S.** EDS spectrum of NiO-Cu 600, (a) O, (b) Ni, (C) Cu, and (d) Elemental mapping images of Ni, O, and Cu.

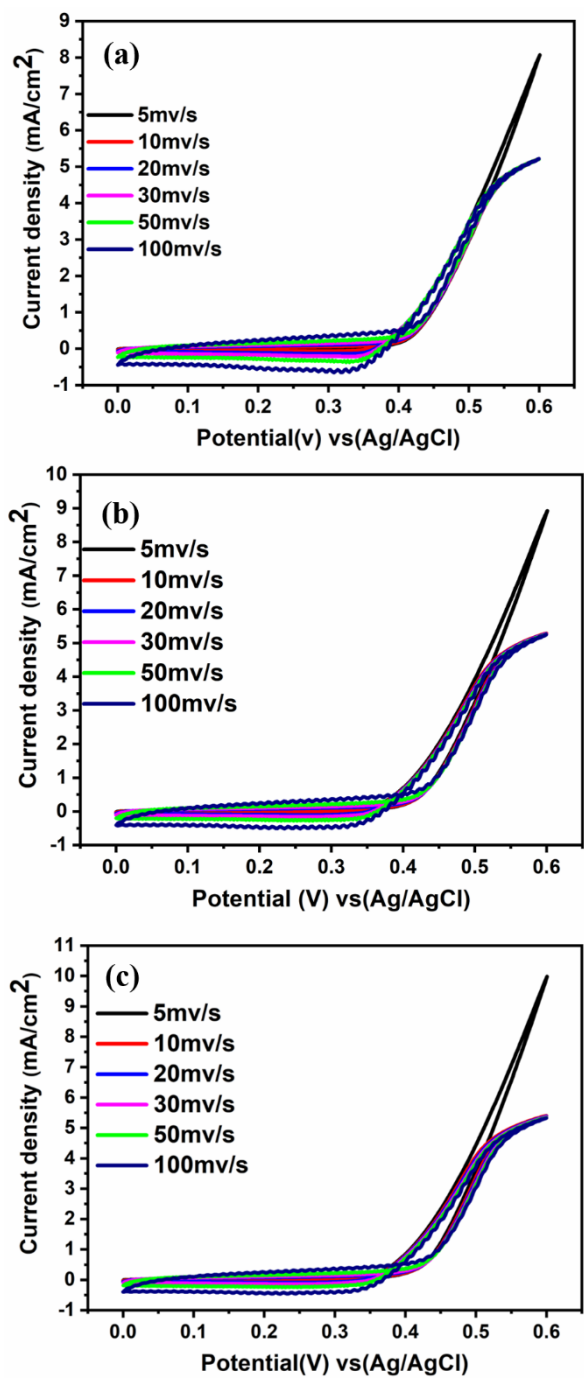

**Fig.4S.** Cyclic voltammograms for of sample (NiO-Cu 300) in 0.5 M KOH at room temperature and different Concentrations of methanol (a)0.5 M methanol (b) 1 M methanol (c) 2 M methanol

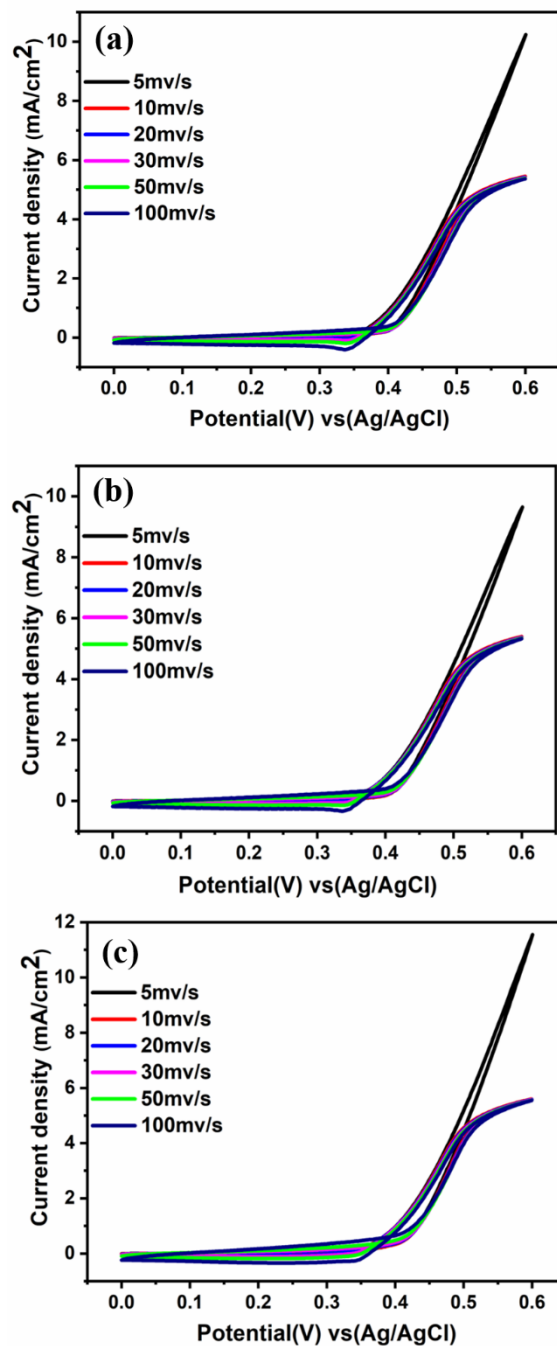

**Fig.5S.** Cyclic voltammograms for of sample (NiO-Cu 600) in 0.5 M KOH at room temperature and different Concentrations of methanol (a)0.5 M methanol (b) 1 M methanol (c) 2 M methanol

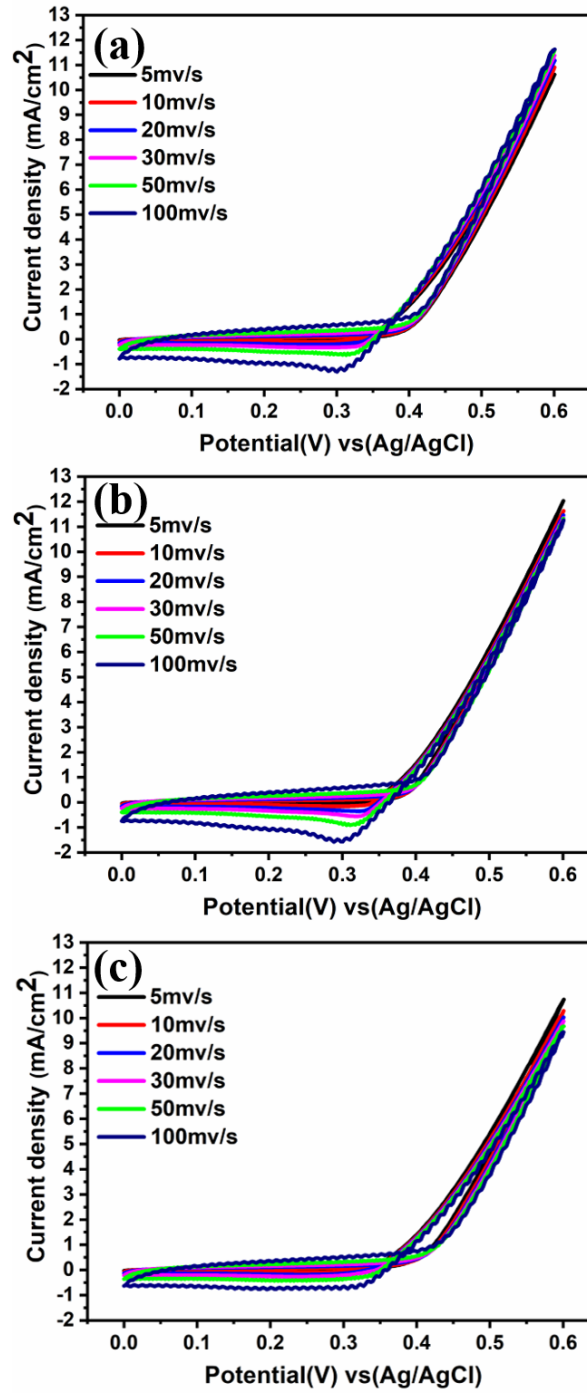

**Fig.6S.** Cyclic voltammograms for of sample (NiO-Cu 900) in 0.5 M KOH at room temperature and different Concentrations of methanol (a)0.5 M methanol (b) 1 M methanol (c) 2 M methanol

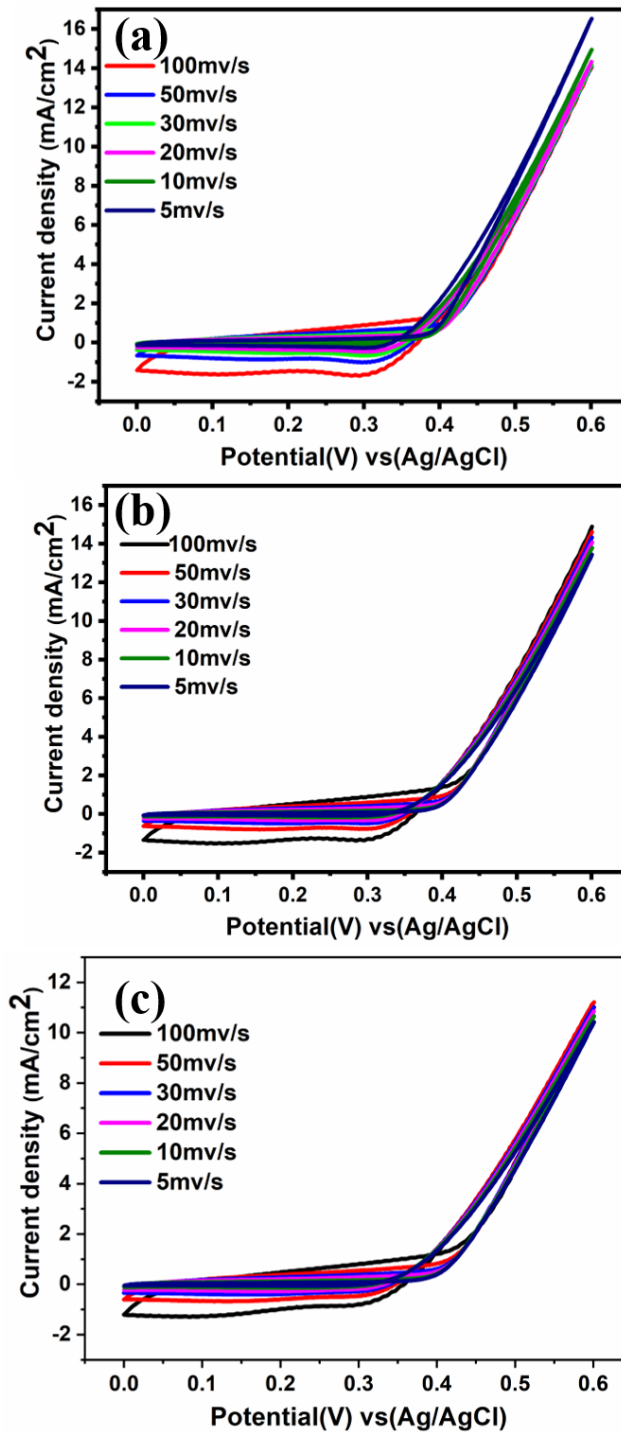

**Fig.7S.** Cyclic voltammograms for of sample (NiO-Cu 1200) in 0.5 M KOH at room temperature and different Concentrations of methanol (a)0.5 M methanol (b) 1 M methanol (c) 2 M methanol
